# Supplementary material for: An aerodynamic assisted miniature mass spectrometer for enhanced volatile sample analysis
Source: Royal Society of Chemistry journal article supplement (doi:10.1039/c6an00956e), 2016-01-01
Supplement: c6an00956e1.pdf [file c6an00956e1.pdf]

## SUPPLEMENTARY MATERIAL

# An Aerodynamic Assisted Miniature Mass Spectrometer For Enhanced Volatile Sample Analysis

Yanbing Zhai,<sup>1</sup> Ting Jiang,<sup>1</sup> Guangyan Huang,<sup>2</sup> Yongzheng Wei,<sup>3</sup> and Wei Xu<sup>1,2,4\*</sup>

<sup>1</sup>School of Life Science, Beijing Institute of Technology, Beijing 100081, China

<sup>2</sup>State Key Laboratory Explosion Science and Technology, Beijing Institute of Technology,  
Beijing 100081, China

<sup>3</sup>First School of Clinic Medicine, Guangzhou University of Chinese Medicine, Guangzhou  
510006, China

<sup>4</sup>Key Laboratory of Convergence Medical Engineering System and Healthcare Technology, the  
Ministry of Industry and Information Technology, Beijing Institute of Technology, Beijing  
100081, China

\*Corresponding Author:

Wei Xu

School of Life Science

Beijing Institute of Technology

Haidian, Beijing, 100081, China

Email: [weixu@bit.edu.cn](mailto:weixu@bit.edu.cn)

Phone: +86-010-68918123

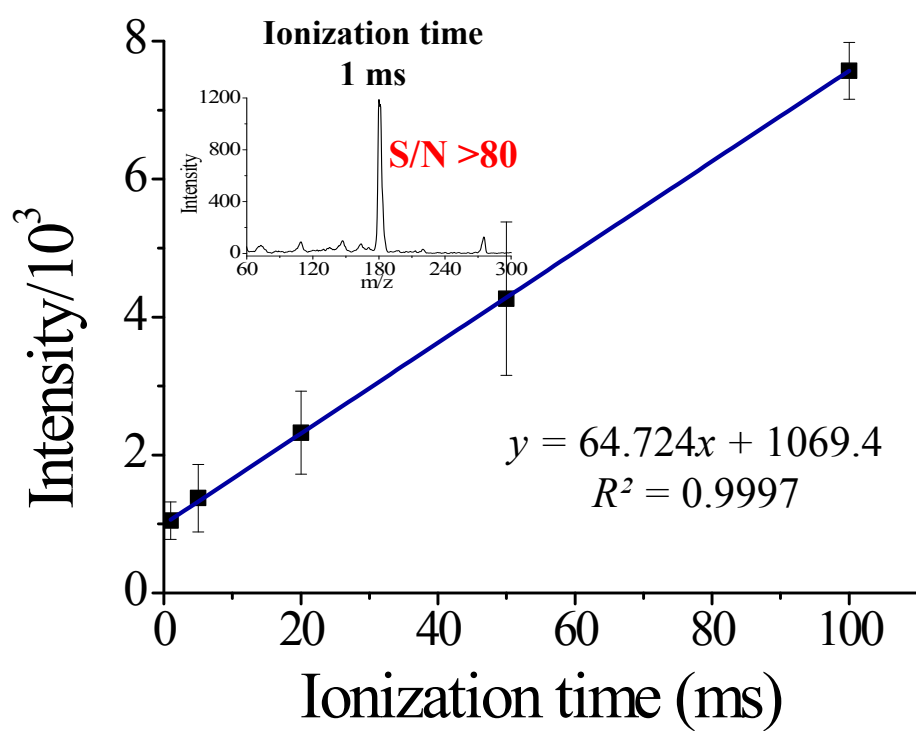

**Figure S1.** Ion intensities recorded as a function of ionization time.

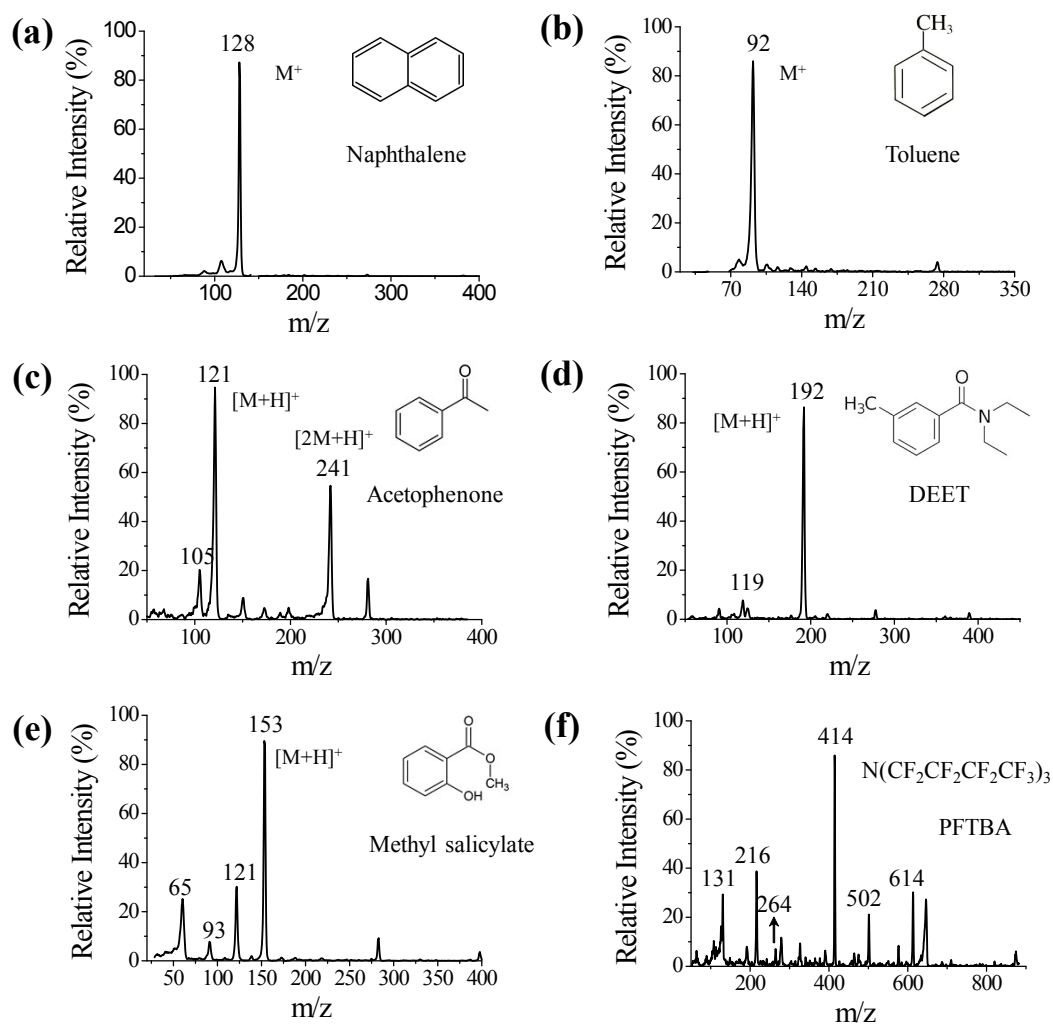

**Figure S2.** Mass spectra recorded using the continuous API mini-MS with in-vacuum plasma ionization source. (a) Naphthalene (m/z 128), (b) toluene (m/z 92), (c) acetophenone (m/z 121), (d) DEET (m/z 192), (e) methyl salicylate (m/z 153) and (f) PFTBA in positive ion mode.

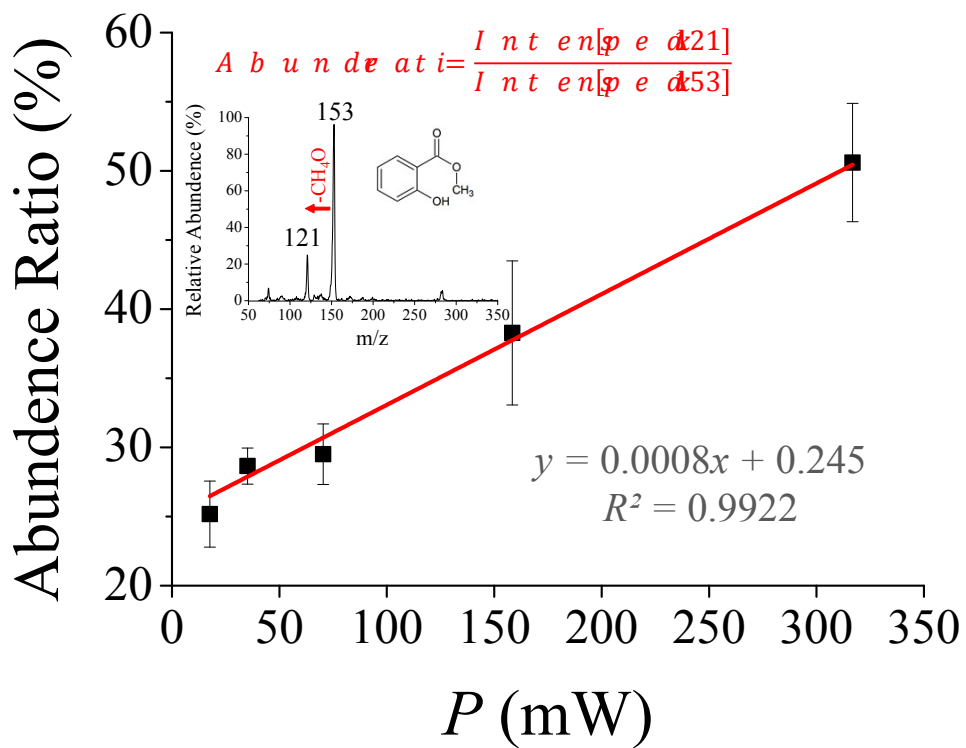

**Figure S3.** The fragment ion abundance ratio of Methyl salicylate with respect to the discharge power consumption (P).

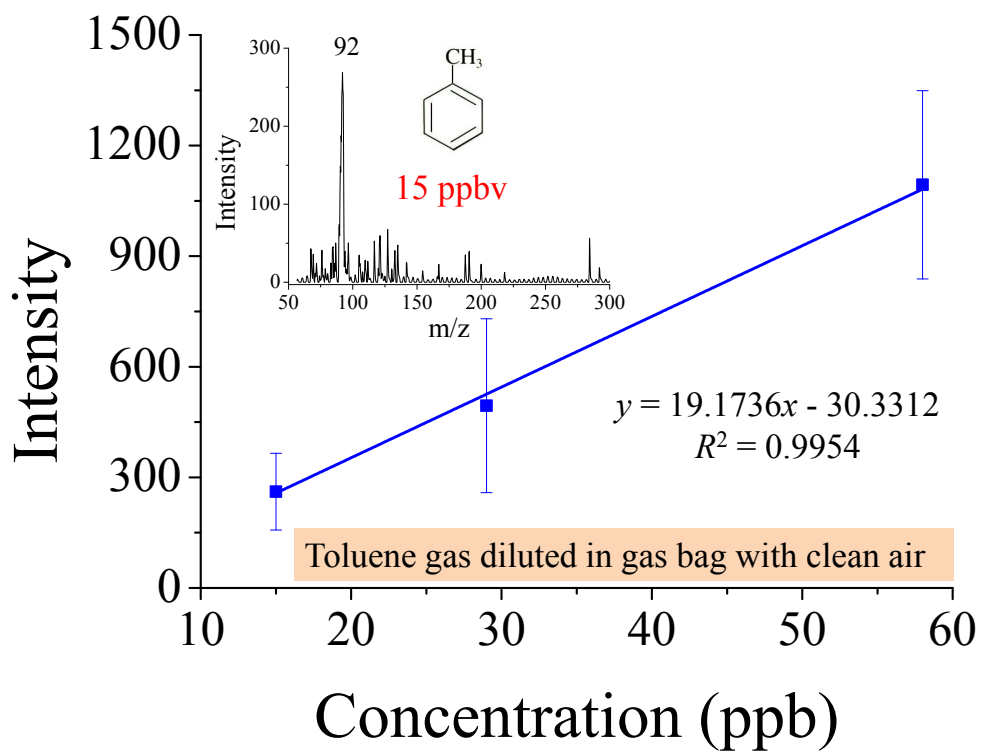

**Figure S4.** The linear of quantitation curve for toluene ( $m/z$  92) prepared in gas bags with clean air. A LOD of 15 ppbv was achieved.

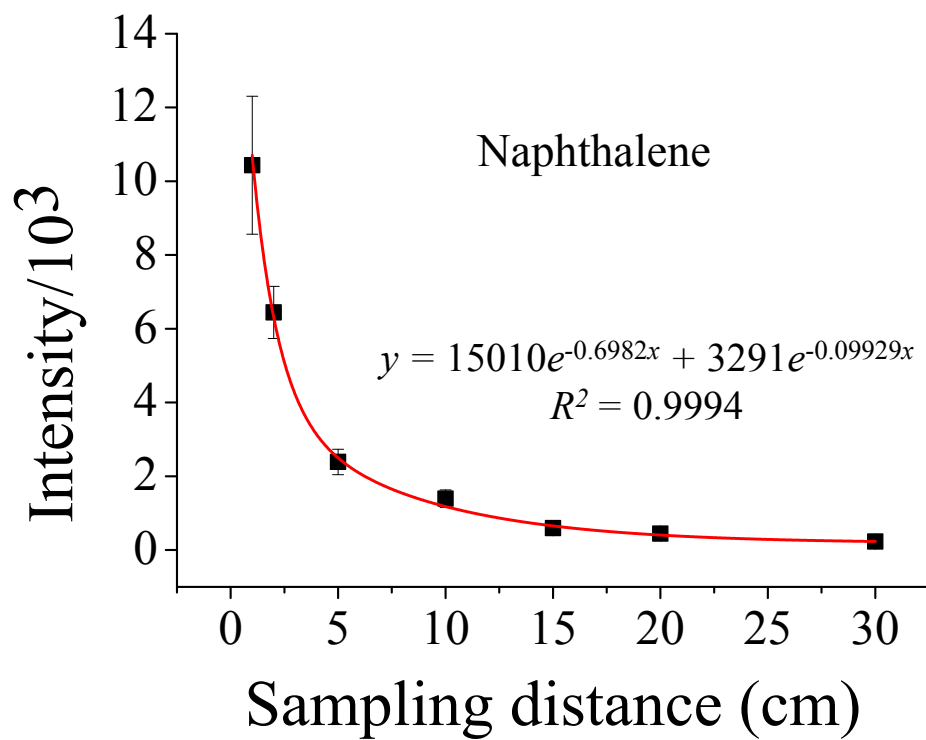

**Figure S5.** Ion signal intensity of naphthalene versus sampling distance (along  $\alpha = 0$ ).
